# Supplementary material
Source: HighWire-hosted journal article supplement (https://jitc.bmj.com/content/12/2/e008155)

Fig. S3

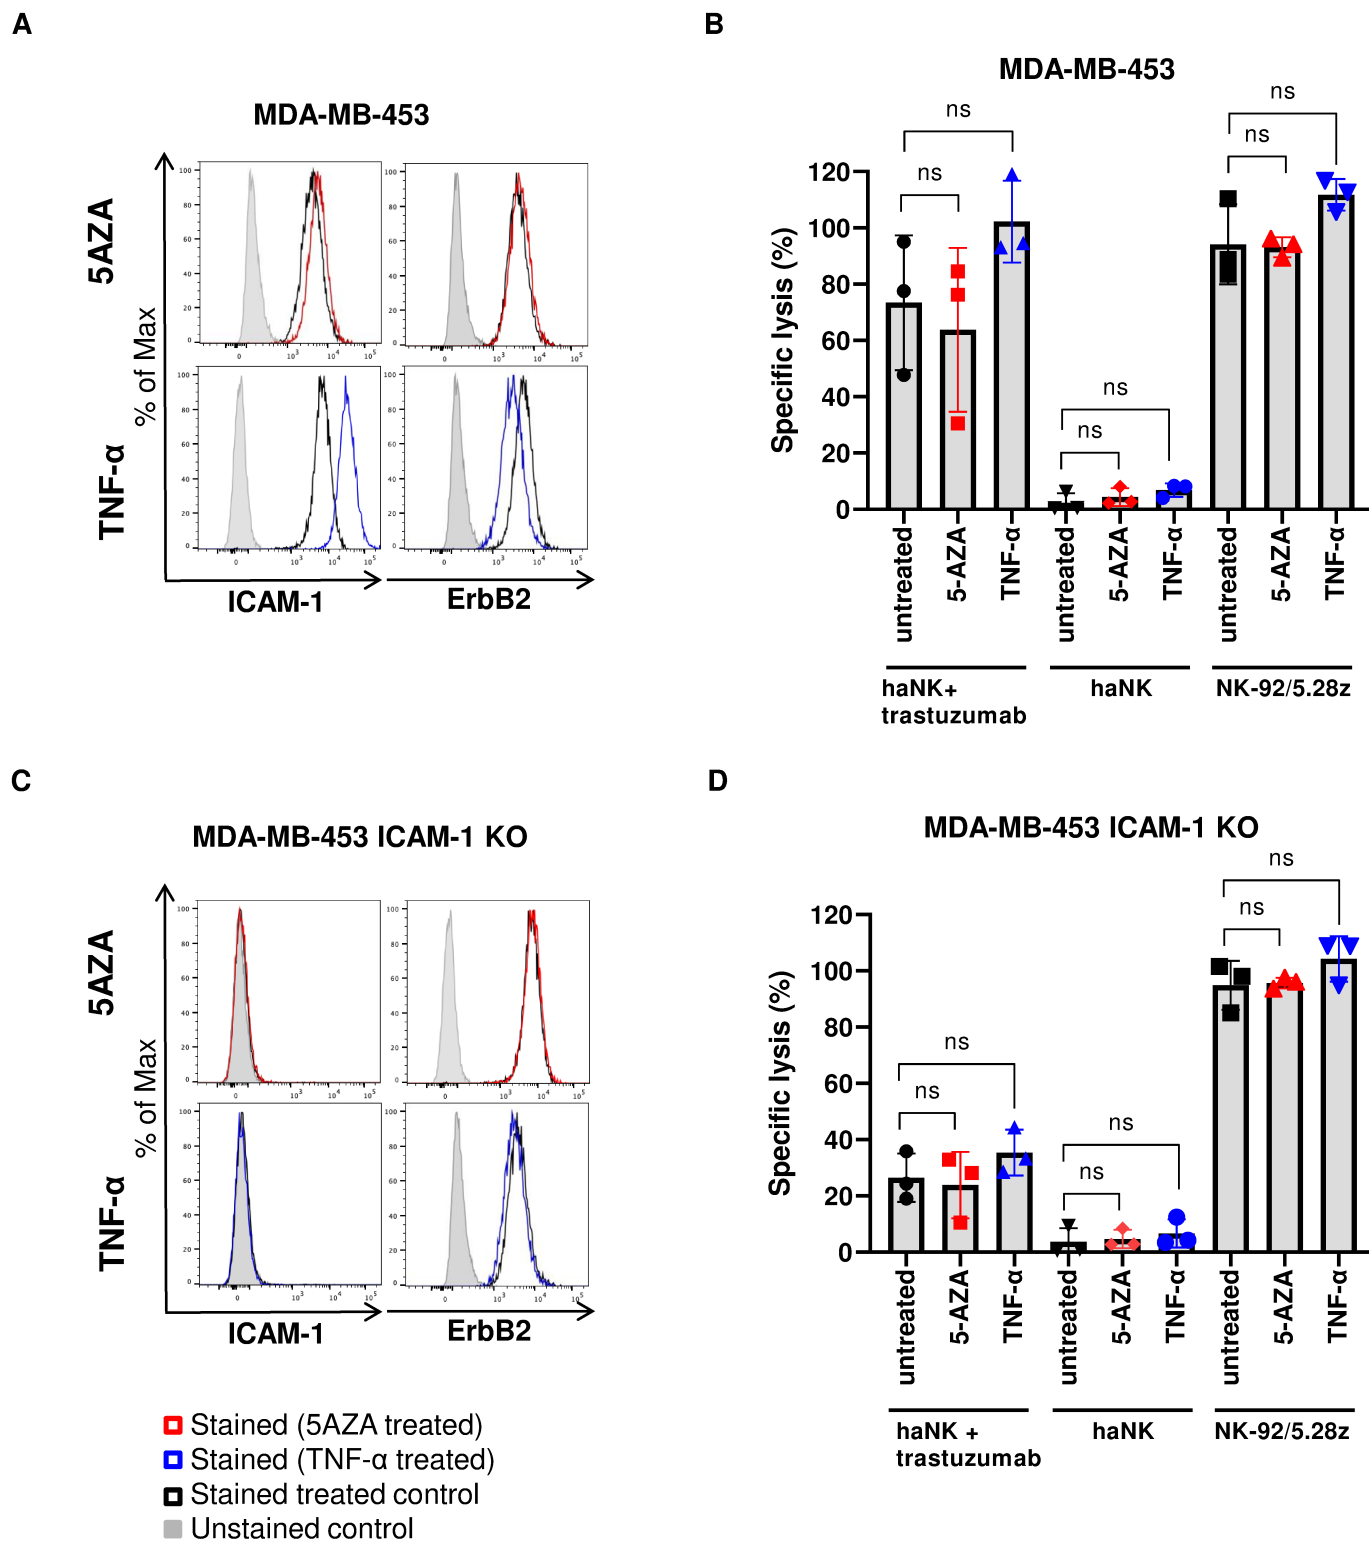

Supplement: inline-supplementary-material-3 [file inline-supplementary-material-3.pdf]
